# Supplementary material for: Theoretical and experimental studies on the separation of cinnamyl acetate and cinnamaldehyde by adsorption onto a β-cyclodextrin polyurethane polymer
Source: Royal Society of Chemistry journal article supplement (doi:10.1039/c7ra07813g), 2017-01-01
Supplement: c7ra07813g1.pdf [file c7ra07813g1.pdf]

### Supplementary Information

Theoretical and experimental studies on the separation of cinnamyl acetate and cinnamaldehyde by adsorption onto a  $\beta$ -cyclodextrin polyurethane polymer

Qinghua Liang <sup>a</sup>, Kungang Chai <sup>a,b,\*</sup>, Ke Lu <sup>a</sup>, Zhijun Xu <sup>b</sup>, Guoyu Li <sup>a</sup>, Zhangfa Tong <sup>a</sup>, Hongbing Ji <sup>a,c,\*</sup>

<sup>a</sup> *School of Chemistry and Chemical Engineering, Guangxi Key Laboratory of Petrochemical Resource Processing and Process Intensification Technology, Guangxi University, Nanning 530004, PR China*

<sup>b</sup> *School of Light Industry and Food Engineering, Guangxi University, Nanning 530004, PR China*

<sup>c</sup> *Fine Chemical Industry Research Institute, School of Chemistry, Sun Yat-sen University, Guangzhou 510275, PR China*

\*Corresponding authors. Tel.: +86 771 3237305; fax: +86 771 3231382 (K. Chai). Tel.: +86 20 84113658; fax: +86 20 84113654 (H. Ji).

*E-mail addresses:* [kylechild@yahoo.com](mailto:kylechild@yahoo.com) (K. Chai), [jihb@mail.sysu.edu.cn](mailto:jihb@mail.sysu.edu.cn) (H. Ji).

## Summary

Table S1. BET-surface areas, pore volumes and sizes of  $\beta$ -CD and CDPU.

Table S2 Deconvoluted components for XPS signals (C1s and O1s) of fresh CDPU and CDPU adsorbed CA or CAc.

Table S3 Numbers, types, bond lengths ( $r$ ) and bond angles ( $A$ ) of intermolecular hydrogen bonds between CDPU and adsorbates calculated by DMol3.

Fig. S1. The atom numbers of CA, CAc, CDPU unit and glucoside-TDI unit.

Fig. S2. XPS spectra of survey scan (a) and N1s (b) of CDPU before and after adsorption of CA and CAc.

Fig. S3 Optimized geometries and binding energy between CDPU and guests obtained by Gaussian.

Fig. S4. The adsorptive performances of CDPU in (a) different types of solvent aqueous solutions and (b) DMSO aqueous solutions with different volume fractions of DMSO at 25 °C.

Fig. S5 The adsorptive performances of CDPU prepared in different molar ratio of TDI/ $\beta$ -CD.

Text S1 Effects of different types of co-solvents on the adsorption of CDPU to CAc and CA.

Text S2 Effects of degree of crosslinking of polymer on the adsorption of CDPU to CAc and CA

Text S3 Information for the adsorbent used for comparison in this study.

Table S1 BET-surface areas, pore volumes and sizes of  $\beta$ -CD and CDPU

| Samples     | BET Surface Area<br>( $\text{m}^2 \cdot \text{g}^{-1}$ ) | BJH adsorption cumulative volume of<br>pores ( $\text{cm}^3 \cdot \text{g}^{-1}$ ) | Adsorption average pore<br>width (nm) |
|-------------|----------------------------------------------------------|------------------------------------------------------------------------------------|---------------------------------------|
| CDPU        | 10.19                                                    | 0.0574                                                                             | 24.54                                 |
| $\beta$ -CD | 0.63                                                     | 0.0027                                                                             | 35.72                                 |

Table S2 Deconvoluted components for XPS signals (C1s, O1s) of fresh CDPU and CDPU adsorbing CA or CAc

| XPS signals  | Sample       | XPS species      | Binding energy (eV) | Area percentage (%) |       |
|--------------|--------------|------------------|---------------------|---------------------|-------|
| C1s          | CDPU         | C*-C/C*-H        | 284.73              | 38.74               |       |
|              |              | C*-NH-C=O        | 285.63              | 5.72                |       |
|              |              | C*-OH/C-O-C*     | 286.23              | 45.56               |       |
|              |              | N-C*(O)=O        | 288.64              | 9.98                |       |
|              | CDPU/CA      | C*-C/C*-H/C*=C   | 284.76              | 52.02               |       |
|              |              | C*-NH-C=O        | 285.60              | 5.18                |       |
|              |              | C*-OH/C-O-C*     | 286.47              | 32.17               |       |
|              |              | N-C*(O)=O/C-C*=O | 288.62              | 9.23                |       |
|              |              | O-C*=O           | 288.00              | 1.40                |       |
|              |              | CDPU/CAc         | C*-C/C*-H/C*=C      | 284.69              | 45.84 |
|              |              |                  | C*-NH-C=O           | 285.62              | 2.24  |
|              | C*-OH/C-O-C* |                  | 286.22              | 41.58               |       |
|              |              |                  | N-C*(O)=O/O-C*(O)=O | 288.80              | 10.34 |
|              | O1s          | CDPU             | C-NH-C=O*           | 531.50              | 10.16 |
| C-O*H/C-O*-C |              |                  | 533.14              | 89.84               |       |
| CDPU/CA      |              | C-NH-C=O*        | 531.50              | 12.34               |       |
|              |              | O-C=O*           | 532.30              | 4.44                |       |
|              |              |                  | C-O*H/C-O*-C        | 533.06              | 83.22 |
| CDPU/CAc     |              | C-NH-C=O*/O-C=O* | 531.40              | 14.51               |       |
|              | C-O*H/C-O*-C | 532.92           | 85.49               |                     |       |
| N1s          | CDPU         | C-N*H-C=O        | 400.12              | 100                 |       |
|              | CDPU/CA      | C-N*H-C=O        | 400.06              | 100                 |       |
|              | CDPU/CAc     | C-N*H-C=O        | 399.83              | 100                 |       |

Table S3 Numbers, types, bond lengths ( $r$ ) and bond angles ( $A$ ) of intermolecular hydrogen bonds between CDPU and adsorbates calculated by DMol3

| Adsorption positions       | Complexes | Numbers | Types              | $r$ (Å) <sup>a</sup> | $A$ (°) <sup>b</sup> |
|----------------------------|-----------|---------|--------------------|----------------------|----------------------|
| CA on crosslink unit       | -         | 4       | O10···H21–O10 (II) | 3.270                | 147.697              |
|                            |           |         | O10···H18–C9 (I)   | 2.944                | 108.954              |
|                            |           |         | C7–H16···O20 (I)   | 3.113                | 91.344               |
|                            |           |         | C6–H15···O36 (I)   | 3.283                | 111.478              |
| CAc on crosslink unit      | -         | 7       | C11–H25···O10 (II) | 3.026                | 117.263              |
|                            |           |         | C22···H21–O10 (II) | 3.419                | 142.520              |
|                            |           |         | O3···H24–C22 (II)  | 3.258                | 139.770              |
|                            |           |         | O10···H20–O10 (II) | 2.656                | 162.820              |
|                            |           |         | O12···H21–C10 (I)  | 2.977                | 93.289               |
|                            |           |         | O12···H21–C10 (I)  | 2.977                | 102.095              |
|                            |           |         | C9–H21···O10 (I)   | 3.407                | 103.174              |
| CA in cyclodextrin cavity  | up        | 10      | C6–H15···O10 (IV)  | 3.184                | 123.738              |
|                            |           |         | C5–H14···O8 (IV)   | 3.273                | 115.562C             |
|                            |           |         | C1–H11···O8 (IV)   | 3.231                | 161.301              |
|                            |           |         | C8–H17···O8 (VI)   | 3.302                | 98.158               |
|                            |           |         | C8–H17···O8 (III)  | 3.452                | 101.389              |
|                            |           |         | C8···H39–O8 (III)  | 3.452                | 175.270              |
|                            |           |         | C9–H18···O8 (VI)   | 3.180                | 110.288              |
|                            |           |         | O10···H15–C6 (VI)  | 3.155                | 121.711              |
|                            |           |         | O10···H16–O7 (VII) | 3.310                | 111.433              |
|                            |           |         | O10···H14–C5 (VII) | 3.092                | 120.592              |
| CAc in cyclodextrin cavity | up        | 13      | C2–H14···O10 (II)  | 3.448                | 101.114              |
|                            |           |         | C2···H21–O10 (II)  | 3.448                | 97.674               |
|                            |           |         | C3–H15···O10 (II)  | 3.154                | 122.558              |
|                            |           |         | C3···H21–O10 (II)  | 3.154                | 90.737               |
|                            |           |         | C5–H16···O2 (II)   | 3.076                | 94.043               |

|                            |      |    |                    |       |         |
|----------------------------|------|----|--------------------|-------|---------|
|                            |      |    | C9–H20···O8 (IV)   | 3.254 | 125.424 |
|                            |      |    | C9···H39–O8 (IV)   | 3.254 | 108.862 |
|                            |      |    | C9–H21···O40 (II)  | 3.369 | 138.596 |
|                            |      |    | O10···H16–O7 (VII) | 3.497 | 104.447 |
|                            |      |    | O12···H39–O8 (III) | 2.609 | 169.560 |
|                            |      |    | O12···H15–C6 (III) | 3.475 | 91.635  |
|                            |      |    | C22–H25···O8 (VI)  | 3.263 | 164.253 |
|                            |      |    | C22–H23···O7 (VII) | 3.253 | 166.724 |
| CA in cyclodextrin cavity  | down | 6  | O10···H17–C9 (II)  | 3.285 | 144.177 |
|                            |      |    | C8–H17···O8 (IV)   | 3.170 | 168.195 |
|                            |      |    | C7–H16···O10 (II)  | 3.172 | 135.327 |
|                            |      |    | C2···H39–O8 (III)  | 3.046 | 153.699 |
|                            |      |    | C3–H13···O8 (IV)   | 3.138 | 161.176 |
|                            |      |    | C3···H39–O8 (IV)   | 3.138 | 96.018  |
| CAC in cyclodextrin cavity | down | 12 | C6–H17···O7 (I)    | 3.294 | 171.158 |
|                            |      |    | C1–H13···O8 (III)  | 3.128 | 92.060  |
|                            |      |    | C1···H39–O8 (III)  | 3.128 | 151.522 |
|                            |      |    | C2–H14···O8 (III)  | 3.074 | 137.540 |
|                            |      |    | C2···H39–O8 (III)  | 3.074 | 95.886  |
|                            |      |    | C2–H14···O8 (VI)   | 3.072 | 92.335  |
|                            |      |    | C2···H39–O8 (V)    | 3.252 | 102.973 |
|                            |      |    | C2–H14···O8 (V)    | 3.252 | 127.973 |
|                            |      |    | C3–H15···O8 (V)    | 3.441 | 111.500 |
|                            |      |    | C3···H39–O8 (V)    | 3.441 | 104.047 |
|                            |      |    | C3—H15···O8 (IV)   | 3.152 | 148.093 |
|                            |      |    | C3···H16–O7 (IV)   | 3.152 | 94.064  |

<sup>a</sup> The bond angle of  $\angle\text{OHO}$  or  $\angle\text{CHO}$ .

<sup>b</sup> The bond length between  $\text{C}\cdots\text{O}$  or  $\text{O}\cdots\text{O}$ .

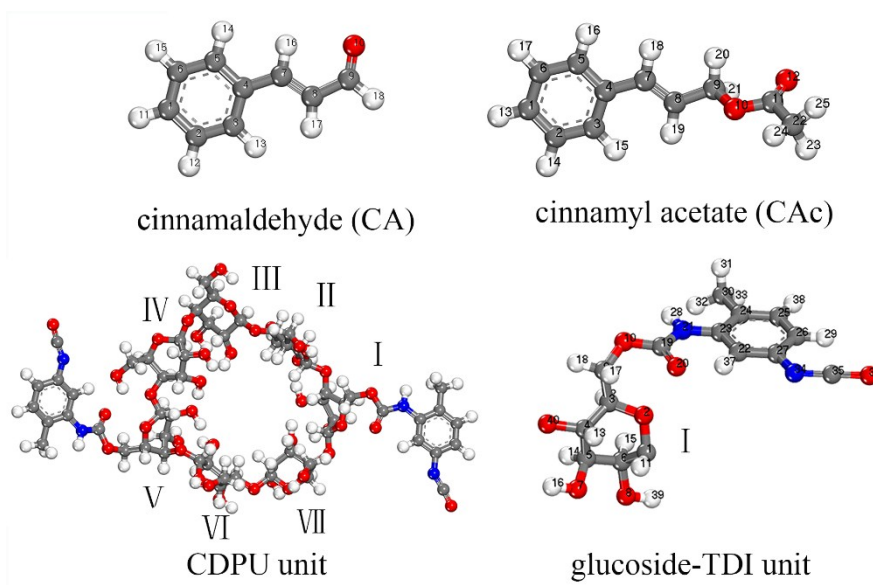

Fig. S1 The atom numbers of CA, Cac, CDPU unit and glucoside-TDI unit.

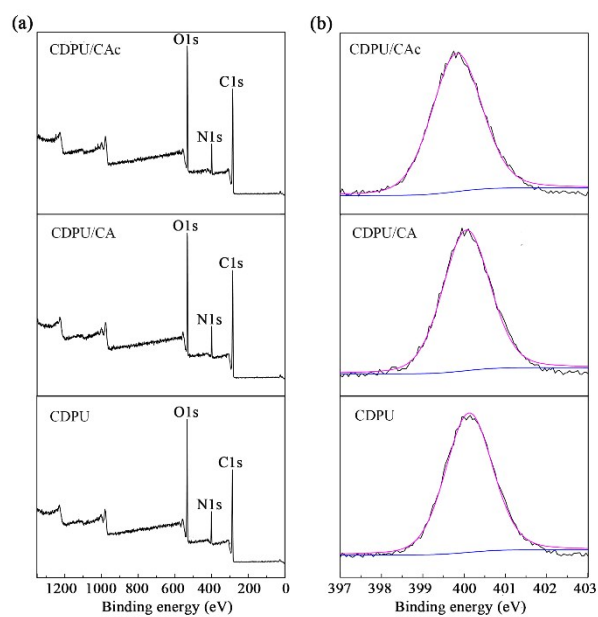

Fig. S2 XPS spectra of survey scan (a) and N1s (b) of CDPU before and after adsorption of CA and CAC.



$E_b = -342.44 \text{ KJ}\cdot\text{mol}^{-1}$

down

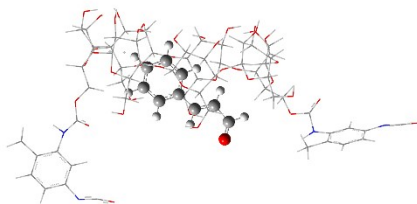

$E_b = -426.48 \text{ KJ}\cdot\text{mol}^{-1}$

down

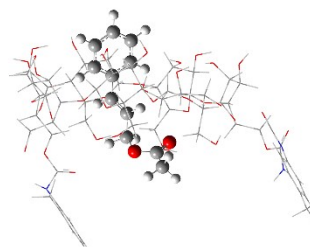

$E_b = -317.73 \text{ KJ}\cdot\text{mol}^{-1}$

up

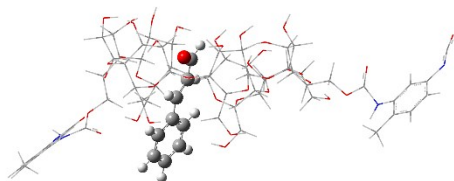

$E_b = -377.56 \text{ KJ}\cdot\text{mol}^{-1}$

up

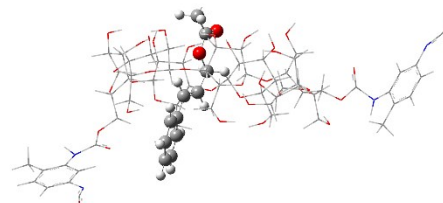

$E_b = -270.61 \text{ KJ}\cdot\text{mol}^{-1}$

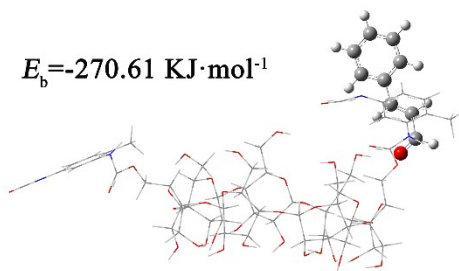

$E_b = -418.03 \text{ KJ}\cdot\text{mol}^{-1}$

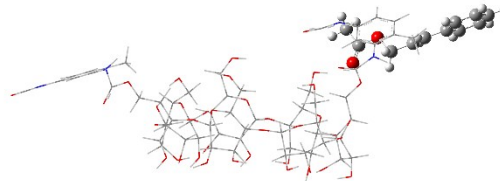

Fig. S3 Optimized geometries and binding energy between CDPU and guests obtained by Gaussian.

Text S1 Effects of different types of co-solvents on the adsorption of CDPU to CAC and CA.

According to the principle of easy availability and low toxicity, we chose five organic solvents (including methanol, dimethyl sulfoxide, ethanol, acetone and 2-propanol) as cosolvent to improve the concentrations of CAC and CA in the aqueous solution. All solvents were analytical grade and used as received from Chengdu Kelong Chemical Reagent Co. Ltd., China. To investigate the influence of varying the cosolvents on the adsorptive performance of CDPU, 70 mmol·L<sup>-1</sup> of equimolar CAC and CA solution was prepared by dissolving certain amount of equimolar mixture of CAC and CA in different types of 40% organic-water solution (v/v). Then the adsorption experiment was conducted by the procedure as described in Section 2.5.3.

As shown in Fig. S4a, the adsorption capacity of CDPU and CAC/CA selectivity both increased with increasing the solvent polarity of solution, as the dielectric constant of five organic solvents are in the order of DMSO (48.9) > methanol (33.1) > ethanol (23.8) > acetone (20.7) > 2-propanol (18.3). And CDPU exhibited the best adsorptive performance in the 40% of DMSO solution (v/v). Using DMSO as cosolvent, in the premise of dissolving all of the substances in the 70 mmol·L<sup>-1</sup> of equimolar CAC-CA solution, adsorption experiment was carried out in DMSO aqueous solutions with different volume percentages of DMSO (40~60%). The adsorption capacity of CDPU declined rapidly as the volume percentage of DMSO increasing, meanwhile the CAC/CA selectivity also decreased (Fig. S4b). This can be explained that the decrease of polarity weakened the hydrophobic interaction, resulting in less adsorbate molecules enter the hydrophobic cavities of the CDPU. Therefore, we chose 40 % DMSO aqueous solution (v/v) as the solvent in further

experiments.

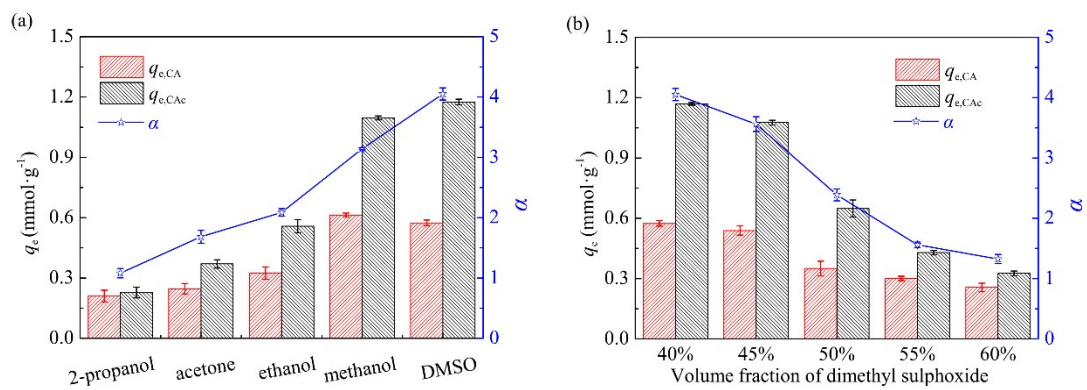

Fig. S4 The adsorptive performances of CDPU in (a) different types of solvent aqueous solutions and (b) DMSO

aqueous solutions with different volume fractions of DMSO at 25 °C.

Text S2 Effects of degree of crosslinking of polymer on the adsorption of CDPU to CAC and CA.

To determine the influence of the degree of crosslinking of polymer onto the adsorption performance of CDPU, 0.2 g of CDPU with various degrees of crosslinking was added into 10 mL of equimolar CAC-CA solutions ( $70 \text{ mmol}\cdot\text{L}^{-1}$ ), being shaken at  $25 \text{ }^\circ\text{C}$  for 4 h. After attaining equilibrium, the equilibrium concentrations of CA and CAC in the supernatant were analyzed by the procedure as described in Section 2.4.

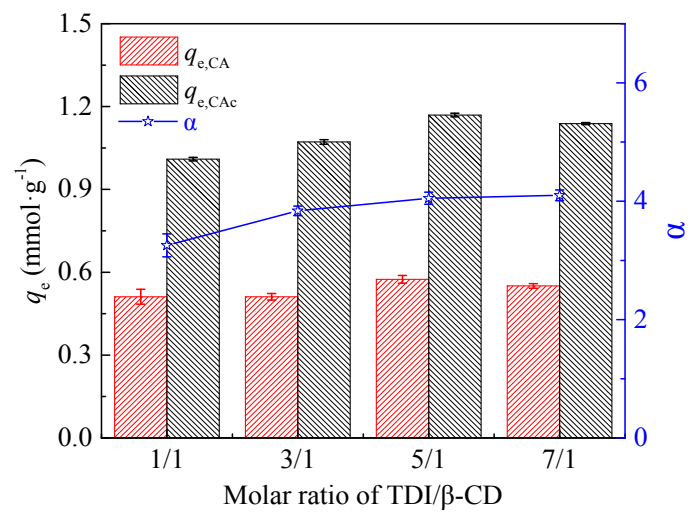

Fig. S5 The adsorptive performances of CDPU prepared in different molar ratio of TDI/β-CD.

Text S3 Information for the adsorbent used for comparison in this study.

For comparison, four adsorbents including the commercial bentonite and activated carbon (abbreviated as AC),  $\beta$ -CD crosslinked hexamethylene diisocyanate (HDI) polymer (abbreviated as CHP) and  $\beta$ -CD crosslinked epichlorohydrin (EPI) polymer (abbreviated as CEP) were employed. The specific information of these materials are as follows:

Bentonite and AC were obtained from J&K Chemical Co. Ltd., (China). The general characteristics of bentonite were: BET surface area ( $76 \text{ m}^2 \text{ g}^{-1}$ ), pore size ( $106 \text{ \AA}$ ), pore volume ( $0.20 \text{ cm}^3 \text{ g}^{-1}$ ), and for AC (as provided by the supplier): particle size (10~24 mesh), BET surface area ( $500\sim 1000 \text{ m}^2 \text{ g}^{-1}$ ). The two adsorbents were used as received without purification.

CHP was prepared by crosslinking  $\beta$ -CD with HDI as crosslinking agent. For synthesizing CHP, the molar ratio of HDI to  $\beta$ -CD was 5/1, and the synthesis procedure was the same as that used for the preparation of CDPU in this study.

CEP was prepared by crosslinking CD with EPI as crosslinking agent. Experimental procedure for the synthesis of CEP was the same as the method previously described in literature <sup>1</sup>.

1. J. Huang, P. Su, B. J. Zhao and Y. Yang, *Anal. Methods*, 2015, **7**, 2754-2761.
